# Supplementary material for: Catalytic behavior of Mn during molten salt oxidation of cationic exchange resins in Li2CO3–Na2CO3–K2CO3 melt
Source: Royal Society of Chemistry journal article supplement (doi:10.1039/d3nj05631g), 2024-01-01
Supplement: d3nj05631g1.pdf [file d3nj05631g1.pdf]

1

## Supporting Information

2

### Catalytic behavior of Mn during molten salt oxidation of cationic

3

### exchange resins in $\text{Li}_2\text{CO}_3\text{-Na}_2\text{CO}_3\text{-K}_2\text{CO}_3$ melt

4

#### 5 Supporting method

6

Switching capacity test method: Firstly, 0.25, 0.5, 1, 1.5, 2, and 4 g of  $\text{MnCl}_2$  were weighed to make 50 ml of exchange solution at concentrations of 0.039, 0.079, 0.158, 0.317, 0.238, and 0.635 mol/L, respectively. Subsequent exchange analysis tests were performed using the pH titration method and ICP exchange efficiency method.

10

(1) The pH titration method: The pH values of the solutions were measured before exchange as “a”, and then the exchange solution was mixed with the resin and placed in a shaker for 48h to complete the exchange. The pH value of the exchanged solution was measured as “b”, and the pH value was adjusted back to “a” by using 1 mol/L sodium hydroxide solution, and the volume of sodium hydroxide consumed was “ $V_1$ ”. Since the sulfonic acid group is a Lewis acid, the effect of ionization of the sulfonic acid group on the pH value should be excluded from the process, and therefore, a blank experiment was set up (the resin was exchanged on a shaking table by mixing it with distilled water, and then the filtrate was adjusted back to its starting value by consuming volume of sodium hydroxide solution as “ $V_2$ ”). Then the Mn content exchanged onto the resin is:

21

$$\text{Molarity of Mn exchange} = (V_1 - V_2)/2$$

22

(2) ICP measurement: ICP is applied to measure the concentration of metal ions in solution. After the resin has been exchanged, the filtrate is diluted to the corresponding concentration and tested by ICP. The concentration of the test result is considered as “ $c_1$ ”. The concentration of the exchange solution before exchange is considered as “ $c_2$ ”.

26

$$\text{Exchange efficiency} = (c_2 - c_1)/c_2 \times 100\%$$

27

According to the test results of pH titration method, the maximum exchange

28 concentration should be between 0.1587 and 0.6349 mol/L, as shown in Fig. S1(a).  
 29 After continuing to increase the exchange concentration, although the number of moles  
 30 exchanged still increased, it could be due to two reasons: (1) hydrolysis of unexchanged  
 31  $Mn^{2+}$  lowered the pH, which was counted in the volume of sodium hydroxide consumed  
 32 and thus increased the test results. (2)  $Mn^{2+}$  is not exchanged into the sulfonic acid  
 33 groups of the resin, but is adsorbed on the surface of the resin particles, thus increasing  
 34 the result. According to the ICP test results in Fig. S1(b), the exchange efficiency must  
 35 meet the requirements of the nuclear level exchange efficiency. Therefore, the  
 36 concentration of 0.158 mol/L exchange solution was used in this experiment in order  
 37 to achieve a better match with the actual treated waste resin.

### 38 Supporting Fig

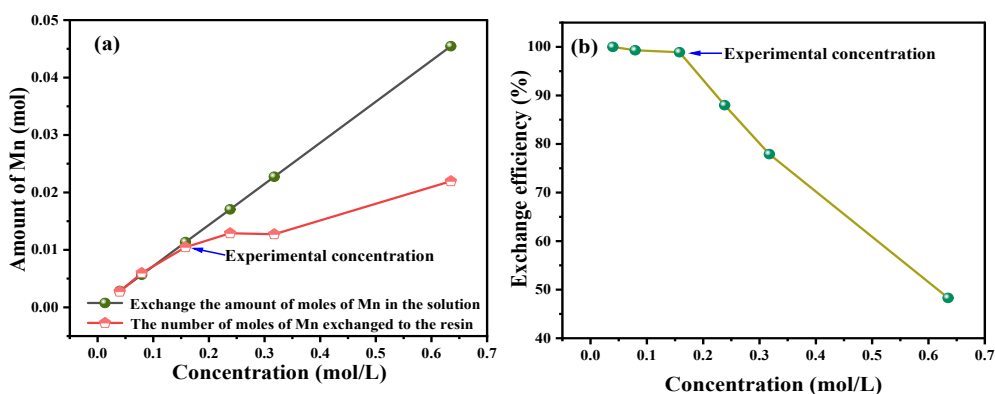

39  
 40 Fig. S1 Exchange adsorption tests for solutions with different Mn ion concentrations: (a) pH titration  
 41 method, (b) ICP exchange efficiency method.

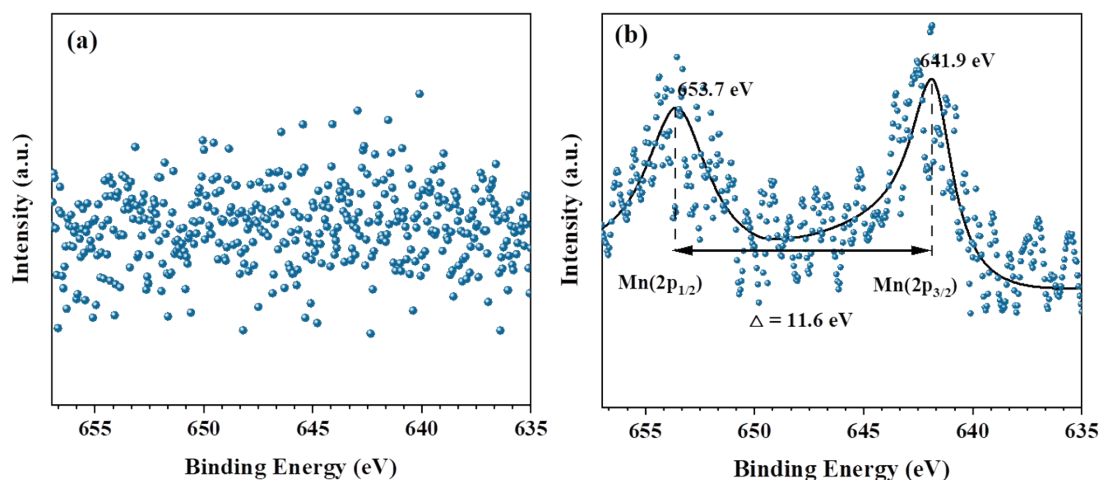

43  
 44 Fig. S2. XPS spectra of samples from molten salt oxidation at 650°C: (a) resin residue, (b) waste

45 salt.

46

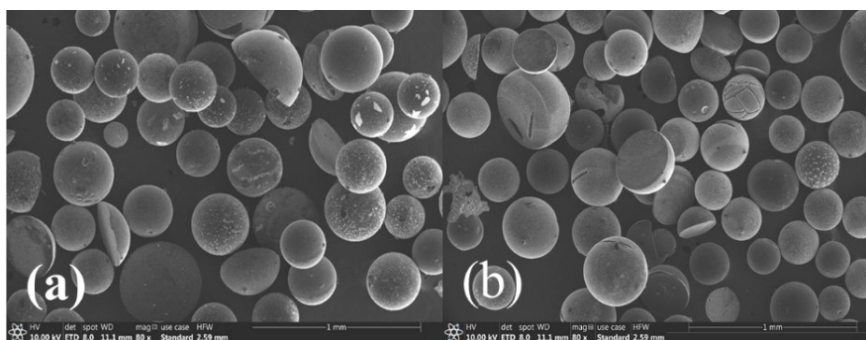

47

48 Fig. S3. The SEM image of cation exchange resin (a) and Mn-doped cation exchange resin (b) at  
49 650 °C.

50

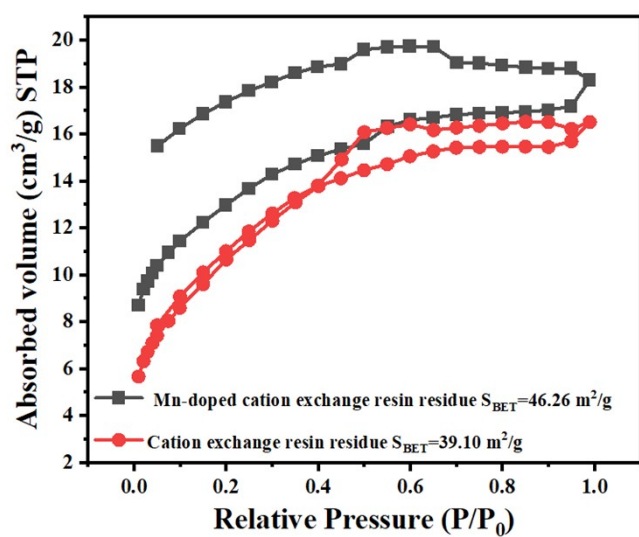

51

52 Fig. S4. The N<sub>2</sub> adsorption isotherm of the undoped and Mn doped resin residues after molten salt  
53 oxidation.
